# Supplementary material for: Microbial inoculation shapes local and systemic grapevine microbiota and wine metabolites across ages and managements
Source: Research Square preprint supplement (doi:10.21203/rs.3.rs-7792101/v1), 2025-11-13
Supplement: Supplementary file 1 [file 293a12395d888d08094f32c4.xlsx]

## Sheet: 16S_rDNA_libraries
Sample-id	raw read pairs	input (primers-trimmed read pairs)	filtered	percentage of input passed filter	denoised	merged	percentage of input merged	non-chimeric	percentage of input non-chimeric	decontaminated	percentage of input decontaminated
vn_ntr_23_1	95787	89565	73689	82.27	73664	72792	81.27	71191	79.49	1822	97.97
vn_ntr_23_2	98836	91391	78373	85.76	78289	77468	84.77	74442	81.45	4472	95.11
vn_ntr_23_3	106536	99166	83052	83.75	82982	81985	82.67	79701	80.37	4130	95.84
vn_trt_23_1	105941	96752	78936	81.59	78884	77878	80.49	76111	78.67	1722	98.22
vn_trt_23_2	74766	61170	46749	76.42	46718	45699	74.71	45373	74.18	1457	97.62
vn_trt_23_3	107266	97739	82138	84.04	81957	80818	82.69	79907	81.76	1765	98.19
vn_trt_23_4	96139	88819	72007	81.07	71952	70985	79.92	70146	78.98	1425	98.40
vo_ntr_23_1	92135	86225	78781	91.37	78684	77608	90.01	70731	82.03	2533	97.06
vo_ntr_23_2	115536	106083	93713	88.34	93545	92403	87.1	84338	79.5	3838	96.38
vo_ntr_23_3	107986	100428	89660	89.28	89540	88054	87.68	78862	78.53	3293	96.72
vo_ntr_23_4	121405	113463	101366	89.34	101249	99592	87.77	89249	78.66	3880	96.58
vo_trt_23_1	101237	93214	81185	87.1	81115	79932	85.75	75387	80.88	2716	97.09
vo_trt_23_2	97178	90642	72219	79.67	72173	71339	78.7	70656	77.95	2762	96.95
vo_trt_23_3	107196	98808	84416	85.43	84321	83194	84.2	78726	79.68	2956	97.01
vo_trt_23_4	106665	99879	86677	86.78	86618	84948	85.05	81631	81.73	2667	97.33

## Sheet: ITS_rDNA_libraries
sample-id	raw read pairs	primers-trimmed read pairs	filtered	percentage of input passed filter	denoised	merged	percentage of input merged	non-chimeric	percentage of input non-chimeric	decontaminated	percentage of input decontaminated
vn_ntr_23_1	52944	39921	32669	81.83	32659	31278	78.35	31266	78.32	7501	81.21
vn_ntr_23_2	116538	110762	87736	79.21	87591	80206	72.41	78623	70.98	33861	69.43
vn_ntr_23_3	94996	88611	69962	78.95	69931	65349	73.75	64960	73.31	12912	85.43
vn_ntr_23_4	118956	109485	81985	74.88	81936	75419	68.89	74503	68.05	18434	83.16
vn_trt_23_1	100209	95444	74998	78.58	74926	68097	71.35	66614	69.79	35764	62.53
vn_trt_23_2	123761	119552	92796	77.62	92734	85298	71.35	84457	70.64	55683	53.42
vn_trt_23_3	119103	115095	86096	74.8	86061	75931	65.97	75305	65.43	54769	52.41
vn_trt_23_4	119993	115885	91649	79.09	91559	81531	70.36	80442	69.42	52412	54.77
vo_ntr_23_1	96879	79939	68889	86.18	68822	63811	79.82	62319	77.96	17471	78.14
vo_ntr_23_2	109703	92810	79994	86.19	79788	74611	80.39	72866	78.51	20663	77.74
vo_ntr_23_3	78876	65010	50559	77.77	50461	45847	70.52	44854	69	10051	84.54
vo_ntr_23_4	112821	95388	82010	85.98	81865	75324	78.97	73056	76.59	20171	78.85
vo_trt_23_1	104046	88693	76496	86.25	76463	69664	78.55	68862	77.64	33085	62.70
vo_trt_23_2	16670	13688	11077	80.92	11076	10240	74.81	10240	74.81	5916	56.78
vo_trt_23_3	101928	85632	72743	84.95	72636	67448	78.76	66802	78.01	29148	65.96
vo_trt_23_4	112329	93619	80257	85.73	80221	74278	79.34	73877	78.91	32378	65.42
