# Supplementary material for: Microbial inoculation shapes local and systemic grapevine microbiota and wine metabolites across ages and managements
Source: Research Square preprint supplement (doi:10.21203/rs.3.rs-7792101/v1), 2025-11-13
Supplement: Supplementary file 2 [file 46fdc1975b7afd133314b977.xlsx]

## Sheet: 16S_rDNA_libraries
Sample-id	raw read pairs	primers-trimmed read pairs	filtered (input)	percentage of input passed filter	denoised	merged	percentage of input merged	non-chimeric	percentage of input non-chimeric	decontaminated	percentage of input decontaminated
VNntr1tpR1	98832	90353	84061	93.04	82860	80251	88.82	78466	86.84	14366	84.10
VNntr1tpR2	58628	54867	51108	93.15	50053	47966	87.42	46930	85.53	11790	78.51
VNntr1tpR3	98057	92410	85735	92.78	84665	81836	88.56	79509	86.04	15700	83.01
VNntr1tpR5	94277	88870	83098	93.51	82100	79852	89.85	78170	87.96	9528	89.28
VNntr1tpRZ1	202903	187005	173731	92.9	169214	149724	80.06	140719	75.25	137544	26.45
VNntr1tpRZ2	175046	162284	150472	92.72	146391	128292	79.05	121706	75	118446	27.01
VNntr1tpRZ3	99002	92167	85308	92.56	82227	71328	77.39	68425	74.24	67039	27.26
VNntr1tpRZ5	138175	129973	121370	93.38	117904	103416	79.57	97751	75.21	96163	26.01
VNntr1tpSL2	113710	105884	94702	89.44	90804	74646	70.5	69323	65.47	68941	34.89
VNntr1tpSL3	68250	62609	59137	94.45	56325	46714	74.61	43207	69.01	42842	31.57
VNntr1tpSL4	82909	77518	72262	93.22	69065	56676	73.11	52361	67.55	52170	32.70
VNntr2tpR1	113963	109676	101868	92.88	100775	97356	88.77	92121	83.99	18999	82.68
VNntr2tpR2	141401	133157	120881	90.78	119725	115954	87.08	111856	84	32135	75.87
VNntr2tpR4	65244	60528	53981	89.18	53107	50888	84.07	50098	82.77	14953	75.30
VNntr2tpR5	71480	56254	24303	43.2	23598	21401	38.04	20819	37.01	7602	86.49
VNntr2tpRZ2	104930	78673	73360	93.25	70480	60699	77.15	58354	74.17	58002	26.27
VNntr2tpRZ3	56734	37823	34958	92.43	32827	26789	70.83	25772	68.14	25444	32.73
VNntr2tpRZ4	191862	164261	153043	93.17	149309	134675	81.99	128507	78.23	128038	22.05
VNntr2tpRZ5	138620	117823	107683	91.39	104570	92031	78.11	87866	74.57	87135	26.05
VNntr2tpSL1	133344	115126	108017	93.83	104206	89951	78.13	83767	72.76	83474	27.49
VNntr2tpSL3	178227	147454	134642	91.31	130404	111980	75.94	103983	70.52	103581	29.75
VNntr2tpSL5	147552	117977	110389	93.57	106684	91276	77.37	84563	71.68	84144	28.68
VNtrt1tpR1	138443	129914	121946	93.87	120453	116375	89.58	113203	87.14	27403	78.91
VNtrt1tpR3	110514	105093	96922	92.22	95898	93615	89.08	90739	86.34	13641	87.02
VNtrt1tpR4	107319	96403	87571	90.84	86418	84203	87.34	82868	85.96	11601	87.97
VNtrt1tpR5	78829	73507	62531	85.07	61055	57962	78.85	56358	76.67	15227	79.28
VNtrt1tpRZ1	89134	84056	76985	91.59	73725	61540	73.21	58948	70.13	56396	32.91
VNtrt1tpRZ3	135156	125809	114841	91.28	111187	95138	75.62	90577	72	88869	29.36
VNtrt1tpRZ4	113023	104228	93671	89.87	90060	75213	72.16	71586	68.68	70865	32.01
VNtrt1tpRZ5	98844	92330	85078	92.15	81886	68777	74.49	65451	70.89	64798	29.82
VNtrt1tpSL1	144695	127576	117545	92.14	113432	96454	75.61	90329	70.8	89891	29.54
VNtrt1tpSL2	162042	148864	137684	92.49	133044	113547	76.28	105218	70.68	104799	29.60
VNtrt1tpSL5	59645	54392	50020	91.96	47218	36945	67.92	34929	64.22	34744	36.12
VNtrt2tpR1	179463	168169	158159	94.05	156468	150818	89.68	144120	85.7	59460	64.64
VNtrt2tpR2	50916	45338	41810	92.22	41038	39208	86.48	38601	85.14	12173	73.15
VNtrt2tpR3	193569	169268	158934	93.89	157824	154215	91.11	150893	89.14	21104	87.53
VNtrt2tpR4	71231	67445	60800	90.15	59654	56743	84.13	54839	81.31	13253	80.35
VNtrt2tpRZ1	108728	89858	84512	94.05	81718	72160	80.3	68836	76.61	68345	23.94
VNtrt2tpRZ2	135318	118758	110526	93.07	107328	95237	80.19	91727	77.24	91469	22.98
VNtrt2tpRZ3	61769	55038	51743	94.01	49373	40630	73.82	38451	69.86	37421	32.01
VNtrt2tpRZ4	102721	83813	77897	92.94	75179	64690	77.18	60955	72.73	60673	27.61
VNtrt2tpSL2	141115	125582	117604	93.65	113533	96979	77.22	89924	71.61	89508	28.73
VNtrt2tpSL3	160885	141724	130337	91.97	125915	106827	75.38	98570	69.55	98292	30.65
VNtrt2tpSL4	96760	81897	76538	93.46	73200	60752	74.18	57135	69.76	56889	30.54
VOntr1tpR2	90447	83355	73841	88.59	72254	67622	81.13	65802	78.94	19139	77.04
VOntr1tpR3	130536	116687	108946	93.37	107581	102727	88.04	99868	85.59	27146	76.74
VOntr1tpR4	88113	72971	68029	93.23	66930	64279	88.09	62933	86.24	15414	78.88
VOntr1tpR5	117464	104569	98228	93.94	96787	92206	88.18	88618	84.75	32724	68.71
VOntr1tpRZ1	117427	85727	81484	95.05	78869	69879	81.51	65933	76.91	65094	24.07
VOntr1tpRZ3	120384	114787	106466	92.75	102738	85803	74.75	80400	70.04	79919	30.38
VOntr1tpRZ4	62041	48637	44733	91.97	42040	32650	67.13	30978	63.69	30687	36.91
VOntr1tpRZ5	119575	110338	101373	91.87	97702	82290	74.58	76231	69.09	75673	31.42
VOntr1tpSL1	127978	118186	109280	92.46	105288	87140	73.73	80173	67.84	79997	32.31
VOntr1tpSL2	101219	93675	86320	92.15	82546	65738	70.18	61081	65.21	60962	34.92
VOntr1tpSL3	137042	125446	108094	86.17	104068	83639	66.67	77276	61.6	77146	38.50
VOntr2tpR1	76915	73734	69003	93.58	67915	64961	88.1	62883	85.28	13691	81.43
VOntr2tpR2	162136	157096	146289	93.12	144829	140496	89.43	133520	84.99	14891	90.52
VOntr2tpR3	89101	84518	71295	84.35	69906	66318	78.47	63897	75.6	10299	87.81
VOntr2tpR5	98541	95376	87095	91.32	86460	85308	89.44	84299	88.39	2575	97.30
VOntr2tpRZ1	50987	39454	36890	93.5	34482	27050	68.56	25568	64.8	25373	35.69
VOntr2tpRZ2	98270	93315	87573	93.85	83918	69730	74.73	65019	69.68	63773	31.66
VOntr2tpRZ4	55813	46075	43104	93.55	40860	33319	72.31	31213	67.74	30570	33.65
VOntr2tpRZ5	131101	116188	106018	91.25	101726	83674	72.02	77915	67.06	76317	34.32
VOntr2tpSL2	185210	167480	156139	93.23	151029	129777	77.49	118128	70.53	117975	29.56
VOntr2tpSL3	50843	35909	33203	92.46	30970	23252	64.75	21634	60.25	21560	39.96
VOntr2tpSL5	110141	92798	86600	93.32	83002	68064	73.35	62715	67.58	62121	33.06
VOtrt1tpR1	126296	118089	109102	92.39	107958	104730	88.69	102427	86.74	15223	87.11
VOtrt1tpR3	105967	99021	91889	92.8	90839	87527	88.39	84765	85.6	19910	79.89
VOtrt1tpR4	157905	147953	137802	93.14	136051	130480	88.19	125813	85.04	34444	76.72
VOtrt1tpR5	138270	125808	117861	93.68	116719	113024	89.84	110189	87.59	25620	79.64
VOtrt1tpRZ1	96470	89845	83842	93.32	80301	66648	74.18	61560	68.52	60629	32.52
VOtrt1tpRZ2	87481	81327	72061	88.61	68300	53390	65.65	49698	61.11	49379	39.28
VOtrt1tpRZ3	127755	119133	108038	90.69	103666	84240	70.71	78865	66.2	77077	35.30
VOtrt1tpRZ5	160085	148438	136870	92.21	132192	112534	75.81	104687	70.53	104054	29.90
VOtrt1tpSL1	113472	102448	95041	92.77	90826	73028	71.28	67539	65.93	67316	34.29
VOtrt1tpSL2	113599	101583	93151	91.7	88926	71918	70.8	66925	65.88	66672	34.37
VOtrt1tpSL4	89010	81190	75829	93.4	72427	58278	71.78	53730	66.18	53611	33.97
VOtrt2tpR1	165185	157844	146147	92.59	143941	137461	87.09	129369	81.96	37078	76.51
VOtrt2tpR2	210774	201971	187732	92.95	185478	178108	88.18	167803	83.08	39428	80.48
VOtrt2tpR4	15487	14008	12625	90.13	12168	11449	81.73	11182	79.83	2321	83.43
VOtrt2tpR5	150038	134050	128138	95.59	127003	124045	92.54	122067	91.06	25463	81.00
VOtrt2tpRZ1	176572	164295	153654	93.52	148981	129293	78.7	120099	73.1	118073	28.13
VOtrt2tpRZ2	215060	186592	173846	93.17	168663	148036	79.34	136048	72.91	133950	28.21
VOtrt2tpRZ3	168970	157961	145580	92.16	140947	121314	76.8	113776	72.03	112405	28.84
VOtrt2tpRZ5	88959	79094	72411	91.55	69399	56758	71.76	53629	67.8	53072	32.90
VOtrt2tpSL1	181574	165592	153903	92.94	149004	125500	75.79	114409	69.09	114152	31.06
VOtrt2tpSL3	114320	101152	92523	91.47	88834	73797	72.96	67804	67.03	67657	33.11
VOtrt2tpSL4	97524	83212	76741	92.22	73165	59202	71.15	54481	65.47	54386	34.64
inoculo1	41777	29707	26058	87.72	24620	22206	74.75	21382	71.98	21311	28.26
inoculo2	88583	58150	51514	88.59	49443	44862	77.15	41858	71.98	36295	37.58
inoculo3	65301	36035	33342	92.53	32111	28992	80.46	27453	76.18	27005	25.06
vnntr4tprt1	700293	608814	587536	96.51	584579	574205	94.32	562758	92.44	85642	85.93
vnntr4tprt2	366155	309081	297924	96.39	296354	291504	94.31	286377	92.65	51637	83.29
vnntr4tprt4	204076	188970	178085	94.24	176475	172481	91.27	165045	87.34	45234	76.06
vnntr4tprt5	116885	84574	79500	94	78382	75578	89.36	73942	87.43	20105	76.23
vnntr4tprz1	607362	557699	523697	93.9	513336	473214	84.85	415825	74.56	414622	25.65
vnntr4tprz2	720326	670213	611317	91.21	598591	544756	81.28	490758	73.22	490189	26.86
vnntr4tprz3	403488	374389	348351	93.05	338963	304530	81.34	275725	73.65	272976	27.09
vnntr4tprz4	113082	83991	78536	93.51	76282	69576	82.84	65997	78.58	65116	22.47
vnntr4tpsl1	883167	822656	769410	93.53	750670	677065	82.3	598358	72.73	596493	27.49
vnntr4tpsl2	988490	918912	867155	94.37	844432	752777	81.92	659498	71.77	658525	28.34
vnntr4tpsl3	536317	495576	467283	94.29	453927	406756	82.08	361821	73.01	361270	27.10
vnntr5tprt1	241472	221488	208002	93.91	206759	203989	92.1	198960	89.83	20005	90.97
vnntr5tprt2	216875	197293	185528	94.04	183765	178535	90.49	172126	87.24	59827	69.68
vnntr5tprt4	148315	140929	132166	93.78	130590	126973	90.1	122320	86.8	26897	80.91
vnntr5tprt5	150170	132017	124272	94.13	123383	121491	92.03	119215	90.3	10500	92.05
vnntr5tprz1	74500	41654	38862	93.3	37597	33889	81.36	31525	75.68	29667	28.78
vnntr5tprz2	426207	342163	319406	93.35	313439	291363	85.15	264308	77.25	262746	23.21
vnntr5tprz4	56825	26524	24736	93.26	23567	20517	77.35	19525	73.61	19148	27.81
vnntr5tprz5	718714	676900	637171	94.13	619602	554320	81.89	491734	72.64	487629	27.96
vnntr5tpsl2	494986	409903	377881	92.19	369284	336940	82.2	300977	73.43	300477	26.70
vnntr5tpsl3	655532	604647	568645	94.05	554738	500680	82.81	439864	72.75	438764	27.43
vnntr5tpsl4	565363	505555	475987	94.15	463835	418994	82.88	371146	73.41	370628	26.69
vntrt4tprt1	660127	569757	552834	97.03	550884	540330	94.84	527480	92.58	118015	79.29
vntrt4tprt2	276209	242310	227699	93.97	225140	217850	89.91	209553	86.48	72217	70.20
vntrt4tprt3	120404	102827	96168	93.52	95000	92478	89.94	90404	87.92	21220	79.36
vntrt4tprt4	151460	132160	124635	94.31	122733	117499	88.91	112122	84.84	46766	64.61
vntrt4tprz1	993635	927571	869394	93.73	848778	770213	83.04	677118	73	666352	28.16
vntrt4tprz2	398240	350900	328561	93.63	320609	294184	83.84	269204	76.72	265377	24.37
vntrt4tprz4	120985	89546	83660	93.43	80729	71840	80.23	66712	74.5	65917	26.39
vntrt4tprz5	582048	536432	505552	94.24	492621	443370	82.65	391511	72.98	391008	27.11
vntrt4tpsl1	849101	798403	751690	94.15	731603	659477	82.6	578199	72.42	576635	27.78
vntrt4tpsl2	798047	738030	694243	94.07	674237	601369	81.48	527676	71.5	526218	28.70
vntrt4tpsl3	781648	729002	681894	93.54	664214	594293	81.52	520762	71.43	519527	28.73
vntrt5tprt1	192318	179567	168712	93.95	165620	156667	87.25	147540	82.16	70484	60.75
vntrt5tprt2	162637	147656	138801	94	136486	129828	87.93	121538	82.31	59796	59.50
vntrt5tprt3	151796	140495	131881	93.87	130114	125808	89.55	120450	85.73	40979	70.83
vntrt5tprt4	139816	126471	118860	93.98	117222	113423	89.68	109981	86.96	20200	84.03
vntrt5tprz1	151698	95412	89352	93.65	86714	77611	81.34	70658	74.06	67452	29.30
vntrt5tprz2	67446	29390	27387	93.18	25964	22779	77.51	21507	73.18	19671	33.07
vntrt5tprz3	58297	17829	16532	92.73	15670	13882	77.86	13306	74.63	13044	26.84
vntrt5tprz4	420841	350671	329677	94.01	321688	293982	83.83	263039	75.01	260806	25.63
vntrt5tpsl1	718071	660044	619798	93.9	601896	534919	81.04	471662	71.46	469260	28.90
vntrt5tpsl2	690508	641044	598319	93.34	581090	516755	80.61	445766	69.54	444851	30.61
vntrt5tpsl3	896778	834031	784181	94.02	764970	694780	83.3	608706	72.98	607574	27.15
vontr4tprt1	376614	323506	312728	96.67	310806	305173	94.33	299170	92.48	26998	91.65
vontr4tprt3	158246	141318	132665	93.88	131376	127930	90.53	123826	87.62	28478	79.85
vontr4tprt4	142299	131787	121679	92.33	120180	116213	88.18	111448	84.57	35741	72.88
vontr4tprt5	191883	159039	149980	94.3	149174	147482	92.73	145585	91.54	8366	94.74
vontr4tprz2	41227	18500	17418	94.15	16806	15552	84.06	14683	79.37	14007	24.29
vontr4tprz3	727124	676627	631158	93.28	615580	551830	81.56	478043	70.65	476871	29.52
vontr4tprz4	34787	16349	14832	90.72	14140	12918	79.01	12544	76.73	9547	41.60
vontr4tprz5	50129	16214	14130	87.15	13027	10619	65.49	10294	63.49	9758	39.82
vontr4tpsl3	657486	614617	568170	92.44	551811	485129	78.93	419243	68.21	418686	31.88
vontr4tpsl4	792478	727092	687735	94.59	668279	584823	80.43	489665	67.35	489104	32.73
vontr4tpsl5	715038	658087	613080	93.16	595718	518771	78.83	442599	67.26	442146	32.81
vontr5tprt1	186321	183037	171746	93.83	169691	163446	89.3	151581	82.81	75828	58.57
vontr5tprt3	213191	200368	187937	93.8	186259	182380	91.02	175513	87.6	40896	79.59
vontr5tprt4	151256	142147	133561	93.96	132385	129628	91.19	124704	87.73	25873	81.80
vontr5tprt5	291248	241544	227082	94.01	225780	222458	92.1	217344	89.98	35804	85.18
vontr5tprz1	402058	343664	323011	93.99	316835	292790	85.2	257770	75.01	256622	25.33
vontr5tprz2	643570	534200	498198	93.26	487322	444788	83.26	386599	72.37	385236	27.89
vontr5tprz3	363807	303494	284495	93.74	278033	254482	83.85	227106	74.83	226477	25.38
vontr5tprz5	252039	188438	177080	93.97	171716	153385	81.4	134702	71.48	134161	28.80
vontr5tpsl1	728055	678343	638169	94.08	620374	545207	80.37	453732	66.89	453320	33.17
vontr5tpsl2	410095	321849	301144	93.57	293967	266836	82.91	230284	71.55	230155	28.49
vontr5tpsl3	611373	505402	475616	94.11	464529	423393	83.77	360582	71.35	360410	28.69
votrt4tprt1	222261	204458	192648	94.22	190665	184784	90.38	176024	86.09	70867	65.34
votrt4tprt2	221894	207778	195255	93.97	193774	189773	91.33	182376	87.77	26580	87.21
votrt4tprt3	133534	117400	110646	94.25	109147	105604	89.95	101869	86.77	21864	81.38
votrt4tprt4	139929	116927	109901	93.99	108570	104612	89.47	101104	86.47	22454	80.80
votrt4tprz2	121425	92294	87153	94.43	84499	76780	83.19	71193	77.14	68810	25.44
votrt4tprz3	590062	534753	502614	93.99	489399	439054	82.1	385074	72.01	382118	28.54
votrt4tprz4	724991	670712	627575	93.57	612505	553564	82.53	487084	72.62	484646	27.74
votrt4tprz5	635860	561792	522544	93.01	510415	463307	82.47	405173	72.12	401743	28.49
votrt4tpsl3	725453	669141	632942	94.59	612867	536044	80.11	450747	67.36	450090	32.74
votrt4tpsl4	613491	568634	533573	93.83	517033	449477	79.05	383760	67.49	383449	32.57
votrt4tpsl5	427489	328504	309172	94.12	301251	272814	83.05	235877	71.8	235674	28.26
votrt5tprt1	139852	123702	115790	93.6	114024	109935	88.87	100784	81.47	33474	72.94
votrt5tprt2	128848	104702	98601	94.17	97638	96129	91.81	94321	90.09	12923	87.66
votrt5tprt3	150456	148566	139371	93.81	137197	130435	87.8	115016	77.42	15816	89.35
votrt5tprt4	157954	149858	140800	93.96	139627	136692	91.21	130335	86.97	30191	79.85
votrt5tprz1	460045	394835	357142	90.45	348783	314976	79.77	279212	70.72	277673	29.67
votrt5tprz2	441456	373673	350322	93.75	341736	311686	83.41	273700	73.25	270988	27.48
votrt5tprz3	310819	225984	210874	93.31	206030	187758	83.08	168258	74.46	167430	25.91
votrt5tprz5	77240	40607	38223	94.13	36761	32851	80.9	30340	74.72	29577	27.16
votrt5tpsl1	566705	468587	441935	94.31	432627	398505	85.04	345136	73.65	344884	26.40
votrt5tpsl3	399495	328547	307579	93.62	299759	270707	82.4	234732	71.45	234598	28.60
votrt5tpsl4	434945	368268	343669	93.32	334369	297100	80.67	257534	69.93	257326	30.13

## Sheet: ITS_rDNA_libraries
sample-id	raw read pairs	primers-trimmed read pairs	input (ITSxpress output)	filtered (input)	percentage of input passed filter	denoised	merged	percentage of input merged	non-chimeric	percentage of input non-chimeric	decontaminated	percentage of input decontaminated
VNntr1tpR1	48852	44867	26225	17413	66.4	17173	16076	61.3	15481	59.03	14345	45.30
VNntr1tpR2	70922	68088	41822	36755	87.88	36509	34313	82.05	31263	74.75	28729	31.31
VNntr1tpR3	96370	88223	42969	28589	66.53	28319	26770	62.3	26188	60.95	25725	40.13
VNntr1tpR5	115094	109662	60733	47753	78.63	47460	44132	72.67	42151	69.4	41992	30.86
VNntr1tpRZ1	179881	171999	118298	94613	79.98	94036	86408	73.04	82119	69.42	80104	32.29
VNntr1tpRZ2	196999	188723	129127	103345	80.03	102628	100020	77.46	95193	73.72	92511	28.36
VNntr1tpRZ3	105107	96568	48714	30910	63.45	30477	28690	58.89	28236	57.96	27804	42.92
VNntr1tpRZ5	165386	158567	107036	87666	81.9	87155	85032	79.44	80185	74.91	78563	26.60
VNntr1tpSL2	132029	124460	69898	48129	68.86	47607	45717	65.41	43823	62.7	39534	43.44
VNntr1tpSL3	73589	70771	53234	46389	87.14	45996	43726	82.14	42215	79.3	38955	26.82
VNntr1tpSL4	91389	87474	63328	53517	84.51	52981	51494	81.31	49943	78.86	45029	28.90
VNntr2tpR1	138436	131693	80620	65040	80.67	64529	59696	74.05	55498	68.84	54970	31.82
VNntr2tpR2	104111	96869	52927	36189	68.38	35911	32573	61.54	30402	57.44	27752	47.57
VNntr2tpR4	145364	139251	89524	76571	85.53	76094	72456	80.93	70856	79.15	70581	21.16
VNntr2tpR5	109667	104568	61812	50442	81.61	50151	46266	74.85	43012	69.59	42368	31.46
VNntr2tpRZ2	225871	215953	150673	127582	84.67	126903	121412	80.58	116228	77.14	113953	24.37
VNntr2tpRZ3	62284	56686	30897	18385	59.5	17868	17025	55.1	16993	55	16747	45.80
VNntr2tpRZ4	125058	118148	75972	56508	74.38	55922	52786	69.48	52104	68.58	51211	32.59
VNntr2tpRZ5	203080	194032	125981	101029	80.19	100069	96306	76.44	93742	74.41	91284	27.54
VNntr2tpSL1	112508	106757	65041	46676	71.76	45854	44296	68.1	43069	66.22	38515	40.78
VNntr2tpSL3	203156	193166	108563	79669	73.39	78736	75761	69.79	73073	67.31	69119	36.33
VNntr2tpSL5	236576	226704	150900	122434	81.14	121656	116946	77.5	111685	74.01	104609	30.68
VNtrt1tpR1	178339	171069	109129	96152	88.11	95711	86953	79.68	85903	78.72	85447	21.70
VNtrt1tpR3	93428	83772	41542	23111	55.63	22874	20709	49.85	19919	47.95	19582	52.86
VNtrt1tpR4	183757	175982	92072	79299	86.13	78999	70694	76.78	66735	72.48	63838	30.67
VNtrt1tpR5	136966	128450	74158	52803	71.2	52442	48410	65.28	46468	62.66	46313	37.55
VNtrt1tpRZ1	109565	104359	69107	53912	78.01	53371	51527	74.56	49803	72.07	49176	28.84
VNtrt1tpRZ3	152422	144503	93943	69844	74.35	69225	67110	71.44	64988	69.18	62214	33.77
VNtrt1tpRZ4	119618	113538	65951	46075	69.86	45534	44236	67.07	43004	65.21	41027	37.79
VNtrt1tpRZ5	53142	48917	25982	15518	59.73	15113	14477	55.72	14252	54.85	13879	46.58
VNtrt1tpSL1	232157	222260	142973	111903	78.27	111214	106212	74.29	100923	70.59	95986	32.86
VNtrt1tpSL2	146645	139946	90608	68757	75.88	67929	65618	72.42	62712	69.21	57686	36.33
VNtrt1tpSL5	125200	118189	69868	51863	74.23	51228	49815	71.3	47799	68.41	44145	36.82
VNtrt2tpR1	122276	117267	79393	67587	85.13	67162	61653	77.66	56247	70.85	55676	29.87
VNtrt2tpR2	135073	125616	68892	50910	73.9	50626	48772	70.79	48394	70.25	48349	29.82
VNtrt2tpR3	210570	202364	135023	116437	86.23	116083	107147	79.35	101967	75.52	99279	26.47
VNtrt2tpR4	153967	147158	94656	77936	82.34	77417	71782	75.83	67081	70.87	66447	29.80
VNtrt2tpRZ1	134176	127949	81869	63199	77.2	62655	60262	73.61	57934	70.76	56727	30.71
VNtrt2tpRZ2	90534	85779	55484	42768	77.08	42362	39702	71.56	39189	70.63	38320	30.94
VNtrt2tpRZ3	71403	68501	48228	39559	82.02	39127	34971	72.51	33228	68.9	32474	32.67
VNtrt2tpRZ4	184410	176826	121411	97433	80.25	96655	93405	76.93	87866	72.37	85079	29.92
VNtrt2tpSL2	163702	156830	105017	84493	80.46	83782	81863	77.95	78493	74.74	72654	30.82
VNtrt2tpSL3	58477	52076	25756	13009	50.51	12449	11973	46.49	11918	46.27	10921	57.60
VNtrt2tpSL4	169762	162572	107626	84012	78.06	83300	79301	73.68	76328	70.92	72003	33.10
VOntr1tpR2	109550	102175	53560	38030	71	37593	36197	67.58	34915	65.19	33408	37.63
VOntr1tpR3	191374	181465	106994	79530	74.33	79076	74326	69.47	72989	68.22	70105	34.48
VOntr1tpR4	180002	171151	107933	89495	82.92	88912	85359	79.09	82089	76.06	80937	25.01
VOntr1tpR5	184958	177973	113173	92748	81.95	92339	87528	77.34	82287	72.71	78984	30.21
VOntr1tpRZ1	239797	230533	184125	167613	91.03	166937	162250	88.12	160501	87.17	143418	22.11
VOntr1tpRZ3	221484	213807	155896	135267	86.77	134400	127277	81.64	123192	79.02	114036	26.85
VOntr1tpRZ4	164331	157222	103578	82585	79.73	81799	78570	75.86	77409	74.73	72064	30.43
VOntr1tpRZ5	50978	45655	25013	14054	56.19	13347	12716	50.84	12605	50.39	12127	51.52
VOntr1tpSL1	52848	48188	26537	14794	55.75	13894	12890	48.57	11997	45.21	9392	64.61
VOntr1tpSL2	121221	112776	63176	40672	64.38	39205	37518	59.39	36430	57.66	28313	55.18
VOntr1tpSL3	176635	169118	115824	94000	81.16	92932	89630	77.38	87015	75.13	76318	34.11
VOntr2tpR1	53447	50754	30736	23548	76.61	23174	21355	69.48	21106	68.67	20908	31.98
VOntr2tpR2	153636	148084	99201	88318	89.03	87833	81953	82.61	71015	71.59	70520	28.91
VOntr2tpR3	102042	94587	48737	34058	69.88	33609	32142	65.95	30632	62.85	29055	40.38
VOntr2tpR5	175079	168556	130158	124213	95.43	123943	122892	94.42	118370	90.94	114082	12.35
VOntr2tpRZ1	113874	109460	74426	59330	79.72	58529	55525	74.6	54665	73.45	50543	32.09
VOntr2tpRZ2	126338	121701	90659	78620	86.72	77638	74399	82.06	72945	80.46	70045	22.74
VOntr2tpRZ4	50428	47647	29838	22693	76.05	21838	20882	69.98	20253	67.88	18920	36.59
VOntr2tpRZ5	122870	112705	51538	31538	61.19	30578	29461	57.16	28360	55.03	26891	47.82
VOntr2tpSL2	209220	200720	134090	107215	79.96	105974	101014	75.33	98933	73.78	82611	38.39
VOntr2tpSL3	191447	183088	119605	93703	78.34	92554	88868	74.3	86873	72.63	71895	39.89
VOntr2tpSL5	63324	59074	33562	22044	65.68	21000	19907	59.31	19640	58.52	16560	50.66
VOtrt1tpR1	148911	141632	75187	54099	71.95	53523	50774	67.53	49113	65.32	48734	35.18
VOtrt1tpR3	66221	60670	37656	25700	68.25	25368	24141	64.11	22932	60.9	22659	39.83
VOtrt1tpR4	195628	187154	128474	108637	84.56	108002	99174	77.19	94189	73.31	88199	31.35
VOtrt1tpR5	158703	151901	99540	81588	81.97	81210	79018	79.38	74721	75.07	70655	29.02
VOtrt1tpRZ1	125989	120651	85046	69950	82.25	69111	67393	79.24	65792	77.36	62777	26.18
VOtrt1tpRZ2	70325	63884	35025	19398	55.38	18476	17165	49.01	17046	48.67	15283	56.37
VOtrt1tpRZ3	182950	173931	106418	77854	73.16	76615	73045	68.64	69371	65.19	63206	40.61
VOtrt1tpRZ5	202327	193541	129123	103916	80.48	102619	98906	76.6	96904	75.05	90700	29.76
VOtrt1tpSL1	117116	112208	77777	63844	82.09	62874	60744	78.1	58467	75.17	49086	36.89
VOtrt1tpSL2	190442	181434	111287	85938	77.22	84687	80650	72.47	77022	69.21	67247	39.57
VOtrt1tpSL4	97437	93595	65659	55434	84.43	54664	52077	79.31	50916	77.55	43696	33.45
VOtrt2tpR1	165671	158360	99348	81197	81.73	80759	76295	76.8	72106	72.58	71854	27.67
VOtrt2tpR2	64500	61264	37780	31224	82.65	30755	29402	77.82	28560	75.6	28202	25.35
VOtrt2tpR4	50864	43177	24061	21585	89.71	21409	20742	86.21	20474	85.09	16319	32.18
VOtrt2tpR5	203150	195545	144283	136451	94.57	136067	133285	92.38	129215	89.56	117665	18.45
VOtrt2tpRZ1	140285	135005	96321	83146	86.32	82053	78410	81.4	76844	79.78	72911	24.30
VOtrt2tpRZ2	159713	153363	107601	91479	85.02	90126	86895	80.76	85269	79.25	82107	23.69
VOtrt2tpRZ3	139043	132739	83713	63523	75.88	62344	59885	71.54	57739	68.97	52707	37.04
VOtrt2tpRZ5	126759	115991	50362	31657	62.86	30380	28317	56.23	27871	55.34	25637	49.09
VOtrt2tpSL1	154646	148199	95578	74356	77.8	73040	69894	73.13	67534	70.66	54220	43.27
VOtrt2tpSL3	80093	73553	39519	22946	58.06	21859	20556	52.02	20236	51.21	16995	57.00
VOtrt2tpSL4	201835	193034	123256	94652	76.79	93344	89682	72.76	86347	70.06	73873	40.07
inoculo1	458435	436071	346790	293784	84.72	293009	284305	81.98	230832	66.56	226567	34.67
inoculo2	642495	617390	500125	466507	93.28	465326	456267	91.23	380388	76.06	371018	25.81
inoculo3	411071	396338	324545	304957	93.96	304258	300441	92.57	250870	77.3	246129	24.16
vnntr4tprt1	425172	405332	351610	334011	94.99	332643	327368	93.11	307980	87.59	302289	14.03
vnntr4tprt2	391911	373333	327701	311613	95.09	310407	304820	93.02	282642	86.25	255124	22.15
vnntr4tprt4	424282	405945	361334	343331	95.02	342389	334583	92.6	321192	88.89	318484	11.86
vnntr4tprt5	650336	621363	528513	495165	93.69	493001	479065	90.64	461814	87.38	434891	17.71
vnntr4tprz1	322225	307467	272548	255593	93.78	254373	250791	92.02	241392	88.57	236121	13.37
vnntr4tprz2	252910	238326	185287	151693	81.87	150498	147178	79.43	139253	75.16	130911	29.35
vnntr4tprz3	340321	325016	286911	269517	93.94	268434	264906	92.33	250801	87.41	242545	15.46
vnntr4tprz4	300242	287099	248348	233179	93.89	231558	224441	90.37	214677	86.44	203041	18.24
vnntr4tpsl1	358385	338174	252860	207394	82.02	205968	201058	79.51	193354	76.47	183516	27.42
vnntr4tpsl2	539713	516181	449726	421863	93.8	420453	415470	92.38	400955	89.16	374579	16.71
vnntr4tpsl3	526419	502796	444987	416359	93.57	415098	409799	92.09	394274	88.6	369882	16.88
vnntr5tprt1	271688	258501	221961	206880	93.21	206128	201839	90.93	189144	85.21	179370	19.19
vnntr5tprt2	296396	282323	256205	239825	93.61	239156	236195	92.19	230106	89.81	227963	11.02
vnntr5tprt4	221771	211452	188534	178318	94.58	177724	176215	93.47	173404	91.97	172171	8.68
vnntr5tprt5	589135	561675	491782	467401	95.04	466104	459788	93.49	448822	91.26	448083	8.89
vnntr5tprz1	324679	310869	254517	237214	93.2	236671	233927	91.91	209016	82.12	199778	21.51
vnntr5tprz2	254665	240978	197496	168334	85.23	167606	163954	83.02	158911	80.46	156017	21.00
vnntr5tprz4	283799	271886	221488	207166	93.53	206525	202831	91.58	181737	82.05	176706	20.22
vnntr5tprz5	279240	265539	215395	199245	92.5	198004	195320	90.68	188682	87.6	179814	16.52
vnntr5tpsl2	538947	514588	447930	419230	93.59	417271	406300	90.71	390949	87.28	358715	19.92
vnntr5tpsl3	525870	502219	429355	397281	92.53	395909	391178	91.11	373008	86.88	347219	19.13
vnntr5tpsl4	582587	556215	483589	452114	93.49	450746	445206	92.06	418625	86.57	389567	19.44
vntrt4tprt1	556344	529566	423462	385346	91	384362	369433	87.24	330006	77.93	311442	26.45
vntrt4tprt2	431651	410797	369854	351321	94.99	350304	345566	93.43	334807	90.52	333038	9.95
vntrt4tprt3	298981	284698	253843	239618	94.4	238910	228769	90.12	214382	84.45	206996	18.46
vntrt4tprt4	359809	343192	312298	294351	94.25	293601	287304	92	265084	84.88	257311	17.61
vntrt4tprz1	510954	487984	429111	399566	93.11	398191	392661	91.51	378500	88.21	365505	14.82
vntrt4tprz2	354287	337947	300099	282351	94.09	281116	277176	92.36	269142	89.68	260263	13.27
vntrt4tprz4	339953	321763	257552	219220	85.12	218247	209317	81.27	196096	76.14	186534	27.57
vntrt4tprz5	321472	307259	276935	257473	92.97	256564	251943	90.98	243192	87.82	235331	15.02
vntrt4tpsl1	471508	451085	391229	364366	93.13	362995	358650	91.67	348826	89.16	331351	15.31
vntrt4tpsl2	460168	440074	377416	348269	92.28	346628	341680	90.53	327664	86.82	311186	17.55
vntrt4tpsl3	430464	411159	359645	332890	92.56	331541	327990	91.2	314795	87.53	300995	16.31
vntrt5tprt1	309987	295448	267307	252926	94.62	251999	248792	93.07	222523	83.25	215999	19.19
vntrt5tprt2	298867	285021	255240	242532	95.02	241794	238916	93.6	224181	87.83	223108	12.59
vntrt5tprt3	287845	273808	248166	233960	94.28	233266	228445	92.05	202608	81.64	197391	20.46
vntrt5tprt4	310691	296621	268104	252987	94.36	252155	232626	86.77	227808	84.97	220219	17.86
vntrt5tprz1	419053	399281	314297	276705	88.04	275992	268660	85.48	247745	78.83	237158	24.54
vntrt5tprz2	343424	329795	273139	256488	93.9	255735	251978	92.25	231757	84.85	225954	17.28
vntrt5tprz3	290368	275886	218352	189001	86.56	188631	185760	85.07	165918	75.99	160905	26.31
vntrt5tprz4	364122	347576	300274	280676	93.47	279384	275584	91.78	266204	88.65	255900	14.78
vntrt5tpsl1	594021	565625	470380	436701	92.84	434950	429307	91.27	417148	88.68	393433	16.36
vntrt5tpsl2	545997	520448	444190	414229	93.25	412594	407068	91.64	394536	88.82	374012	15.80
vntrt5tpsl3	550357	526446	460326	431107	93.65	429360	418760	90.97	406401	88.29	378775	17.72
vontr4tprt1	275346	262739	235786	220924	93.7	220261	217376	92.19	211382	89.65	210660	10.66
vontr4tprt3	415921	396724	336269	311803	92.72	310827	305686	90.91	293081	87.16	282735	15.92
vontr4tprt4	271351	258198	213248	192874	90.45	192269	190220	89.2	176434	82.74	173837	18.48
vontr4tprt5	510744	486845	378149	346705	91.68	345885	340070	89.93	319451	84.48	299080	20.91
vontr4tprz2	337627	324255	273277	256944	94.02	256484	253366	92.71	225578	82.55	219662	19.62
vontr4tprz3	220558	207745	162805	130997	80.46	129431	125954	77.36	123841	76.07	118697	27.09
vontr4tprz4	269742	258497	206694	191817	92.8	191373	186203	90.09	151403	73.25	148500	28.15
vontr4tprz5	239252	229173	191579	178505	93.18	177584	172289	89.93	157247	82.08	153165	20.05
vontr4tpsl3	531142	507628	446047	415710	93.2	413584	406511	91.14	395643	88.7	363311	18.55
vontr4tpsl4	547312	504998	297309	221702	74.57	220209	210567	70.82	205486	69.12	188122	36.73
vontr4tpsl5	275611	261255	207152	176716	85.31	174591	169849	81.99	165278	79.79	150964	27.12
vontr5tprt1	251746	238997	189967	166735	87.77	166041	164300	86.49	156829	82.56	153540	19.18
vontr5tprt3	326650	311813	281036	260755	92.78	259988	258640	92.03	252510	89.85	251731	10.43
vontr5tprt4	406266	388287	336450	317109	94.25	316277	314079	93.35	293773	87.32	271664	19.26
vontr5tprt5	398671	381236	338748	321832	95.01	320861	307689	90.83	297743	87.9	293932	13.23
vontr5tprz1	368981	354156	316604	295323	93.28	294538	292306	92.33	281500	88.91	265014	16.29
vontr5tprz2	378865	356641	274774	220044	80.08	218204	213987	77.88	209762	76.34	202695	26.23
vontr5tprz3	343820	329243	289231	272423	94.19	271334	267393	92.45	261293	90.34	248111	14.22
vontr5tprz5	308182	294548	251768	232615	92.39	231453	225048	89.39	220113	87.43	207485	17.59
vontr5tpsl1	426166	403200	323020	271939	84.19	269875	263645	81.62	259249	80.26	235489	27.10
vontr5tpsl2	559107	534233	457601	428553	93.65	426819	418383	91.43	403790	88.24	360791	21.16
vontr5tpsl3	663410	635438	550786	519689	94.35	517406	508522	92.33	493859	89.66	445305	19.15
votrt4tprt1	387376	369436	327603	306258	93.48	305410	300362	91.68	287459	87.75	271110	17.24
votrt4tprt2	289815	276063	228871	216526	94.61	215868	214032	93.52	208330	91.03	199516	12.83
votrt4tprt3	263951	250790	207122	188724	91.12	187974	186044	89.82	176344	85.14	166880	19.43
votrt4tprt4	463180	440929	377005	358303	95.04	357011	349520	92.71	330185	87.58	303807	19.42
votrt4tprz2	562913	540588	460825	433725	94.12	433078	428379	92.96	394262	85.56	372565	19.15
votrt4tprz3	389401	371826	330278	310532	94.02	309360	305290	92.43	296064	89.64	278939	15.54
votrt4tprz4	316708	302583	265642	248129	93.41	246946	244019	91.86	235595	88.69	222644	16.19
votrt4tprz5	284393	267656	212524	174228	81.98	172711	169115	79.57	165386	77.82	153983	27.55
votrt4tpsl3	632582	603987	523876	493708	94.24	491513	483403	92.27	467713	89.28	406229	22.46
votrt4tpsl4	360488	342174	266793	230043	86.23	227741	222051	83.23	215501	80.77	196371	26.40
votrt4tpsl5	560718	536073	472857	445955	94.31	443902	435202	92.04	408099	86.3	373169	21.08
votrt5tprt1	315652	301520	274326	260762	95.06	259922	258163	94.11	249523	90.96	247208	9.89
votrt5tprt2	282927	270227	241683	230283	95.28	229571	226653	93.78	214114	88.59	212851	11.93
votrt5tprt3	264863	253381	230154	218640	95	217732	214731	93.3	187720	81.56	185514	19.40
votrt5tprt4	299023	286022	245957	232932	94.7	232181	230234	93.61	220112	89.49	209445	14.84
votrt5tprz1	454013	432611	355054	318896	89.82	317572	312002	87.87	305226	85.97	291230	17.98
votrt5tprz2	532400	509887	444686	418372	94.08	416641	407575	91.65	396134	89.08	371955	16.36
votrt5tprz3	586359	559685	477785	447032	93.56	445089	436574	91.37	416342	87.14	385380	19.34
votrt5tprz5	371278	356816	301432	282153	93.6	281692	278537	92.4	248113	82.31	233945	22.39
votrt5tpsl1	578657	554193	486368	460216	94.62	458934	453238	93.19	441364	90.75	389161	19.99
votrt5tpsl3	486815	460366	363073	298102	82.11	297125	289519	79.74	282351	77.77	244505	32.66
votrt5tpsl4	471555	446980	360258	306740	85.14	305552	300483	83.41	292750	81.26	253524	29.63
